# Supplementary material
Source: PubMed Central journal article supplement (PMC3906892)
Supplement: nn405701q_si_001.pdf [file nn405701q_si_001.pdf]

## SUPPORTING INFORMATION for

# Gold-Loaded Polymeric Micelles for Computed Tomography– Guided Radiation Therapy Treatment and Radiosensitization

Ajlan Al Zaki<sup>1</sup>, Daniel Joh<sup>2</sup>, Zhiliang Cheng<sup>1</sup>, André Luís Branco De Barros<sup>1</sup>, Gary Kao<sup>2</sup>, Jay Dorsey<sup>2</sup>, Andrew Tsourkas<sup>1,\*</sup>

<sup>1</sup>*Department of Bioengineering, School of Engineering and Applied Sciences, University of Pennsylvania, Philadelphia PA, 19104 USA*

<sup>2</sup>*Department of Radiation Oncology, Perelman School of Medicine, University of Pennsylvania, Philadelphia, PA 19104.*

### SUPPLEMENTARY TABLES:

**Table S1.** Summary of GPM physical-chemical properties

| <b>Hydrodynamic Diameter (nm)</b> | <b>Core Size (nm)</b> | <b>Polydispersity Index</b> | <b>Zeta potential (mV)</b> |
|-----------------------------------|-----------------------|-----------------------------|----------------------------|
| 30.9 ± 2.4                        | 26.8 ± 10.4           | 0.088                       | -1.34 ± 0.17               |
| 57 ± 5.7                          | 39.5 ± 10.3           | 0.063                       | -1.01 ± .05                |
| 78.6 ± 3.8                        | 54.8 ± 7.1            | 0.05                        | -0.95 ± 0.3                |
| 97.8 ± 3.4                        | 70.4 ± 16.8           | .049                        | -1.17 ± 0.04               |
| 130.2 ± 2.7                       | 106.3 ± 11.5          | 0.042                       | -1.5 ± 0.23                |
| 153.8 ± 6.3                       | 115.2 ± 20.3          | .055                        | -1.62 ± 0.85               |

**Table S2.** Biodistribution of GPM in mice at 48 hrs and 1-week post-injection.

| <b>Organs</b> | <b>%ID (48 hr)</b> | <b>%ID/g (48 hr)</b> | <b>%ID (1 week)</b> | <b>%ID/g (1 week)</b> |
|---------------|--------------------|----------------------|---------------------|-----------------------|
| Heart         | 0.1 ± 0.02         | 1.1 ± 0.2            | 0.05 ± 0.004        | 0.4 ± 0.01            |
| Kidney        | 0.7 ± 0.1          | 1.9 ± 0.2            | 0.4 ± 0.01          | 1.1 ± 0.1             |
| Lungs         | 0.4 ± 0.1          | 2.6 ± 0.7            | 0.04 ± 0.005        | 0.3 ± 0.01            |
| Spleen        | 11.6 ± 0.3         | 104.3 ± 14.6         | 6.3 ± 0.6           | 61.9 ± 5.2            |
| Liver         | 17.6 ± 1.8         | 13.9 ± 0.4           | 12.6 ± 1.0          | 10.0 ± 0.5            |
| Feces         | 2.0 ± 0.06         | 0.6 ± 0.02           | 0.64 ± 0.04         | 0.19 ± 0.01           |
| Urine         | Not determined     | 0.006 ± 0.001        | Not determined      | 0.002 ± 0.000         |

**Table S3.** Serum clinical chemistry of mice (n=3) injected with 650 mg Au/kg GPMs and sampled at 24 hours and 1 week compared with mice sham injected with phosphate buffered saline.

|               | <b>BUN</b> | <b>Albumin</b> | <b>ALT</b>    | <b>AST</b>    | <b>Alk. Phos.</b> | <b>GGT</b>  |
|---------------|------------|----------------|---------------|---------------|-------------------|-------------|
| GPMs-Day 1    | 24.3 ± 3.9 | 2.4 ± 0.1      | 157.7 ± 111.7 | 377 ± 146.5   | 114 ± 7.1         | 5.3 ± 0.3   |
| Control-Day 1 | 25 ± 2.1   | 2.4 ± 0.1      | 180 ± 89.3    | 337 ± 122.1   | 129.7 ± 11.8      | 9 ± 1.5     |
| GPMs-Day 7    | 30.3 ± 3.5 | 2.4 ± 0.3      | 93 ± 29.5     | 245.3 ± 102.9 | 62.3 ± 2.9        | 12.7 ± 3.9  |
| Control-Day 7 | 20 ± 2.6   | 2.3 ± 0.2      | 139 ± 4.4     | 267.3 ± 78.1  | 68.7 ± 10.7       | 23.1 ± 13.3 |

|               | <b>Total Bil.</b> | <b>Cholesterol</b> | <b>Calcium</b> | <b>Creatinine</b> | <b>Glucose</b> | <b>Phosphorus</b> |
|---------------|-------------------|--------------------|----------------|-------------------|----------------|-------------------|
| GPMs-Day 1    | 0.5 ± 0.2         | 99.3 ± 9.8         | 8.9 ± 0.4      | 0.2 ± 0.0         | 168.7 ± 24.5   | 8.5 ± 0.3         |
| Control-Day 1 | 1.1 ± 0.0         | 91.3 ± 2.7         | 8.6 ± 0.4      | 0.2 ± 0.0         | 195.7 ± 34.1   | 10 ± 0.4          |
| GPMs-Day 7    | 0.9 ± 0.6         | 77.3 ± 5           | 8.8 ± 0.1      | 0.2 ± 0.1         | 279.7 ± 10.3   | 7.7 ± 0.5         |
| Control-Day 7 | 1.5 ± 0.9         | 180 ± 45           | 9.1 ± 0.6      | 0.1 ± 0.0         | 195.7 ± 34.1   | 8.6 ± 1.6         |

**SUPPLEMENTARY FIGURES:**

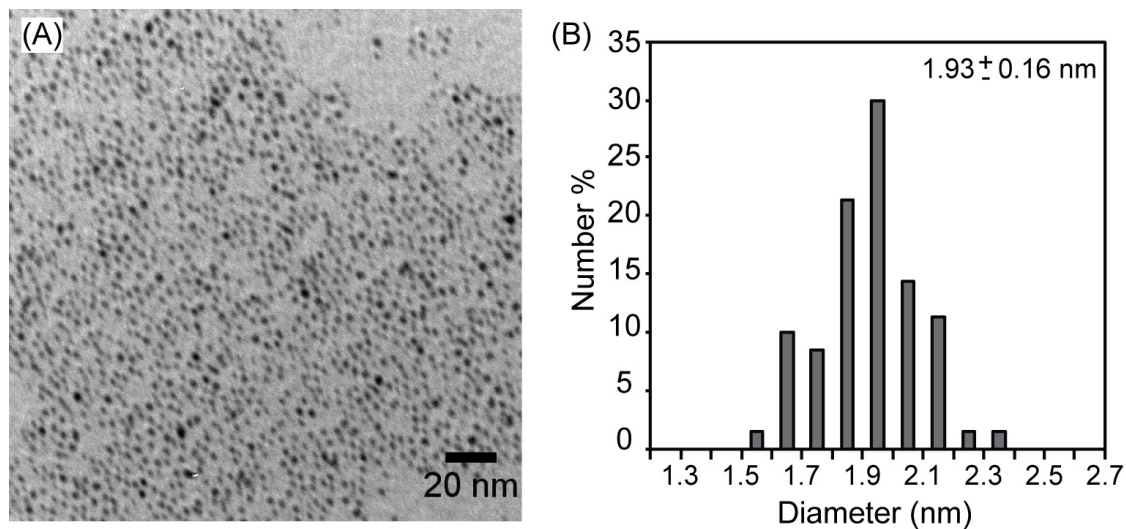

**Figure S1.** (A) Transmission electron micrograph of 1.9 nm AuNPs. Scale bar is 20nm. (B) Core size distribution of 1.9 nm AuNPs. The mean size and standard deviation is shown.

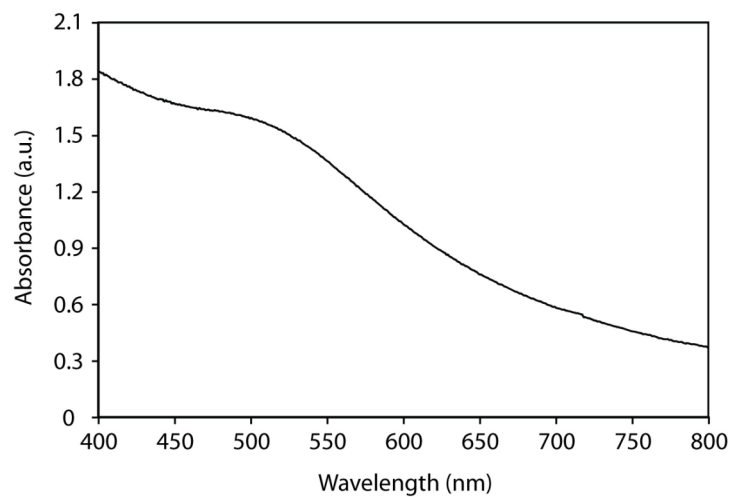

**Figure S2.** UV-vis absorption spectrum of 1.9 nm AuNPs with a broad surface plasmon resonance ranging from 490 nm – 510 nm

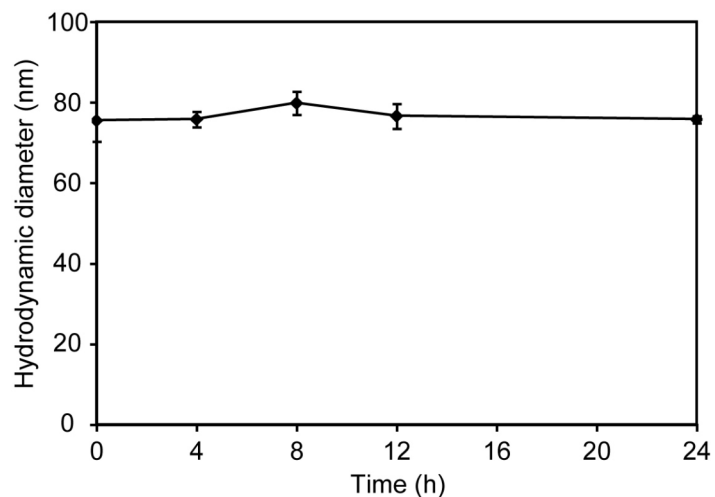

**Figure S3.** Mean hydrodynamic diameter of GPMs in fetal bovine serum as determined by dynamic light scattering. GPMs were incubated at 37°C and the hydrodynamic diameter was measured over the course of 24 hours.

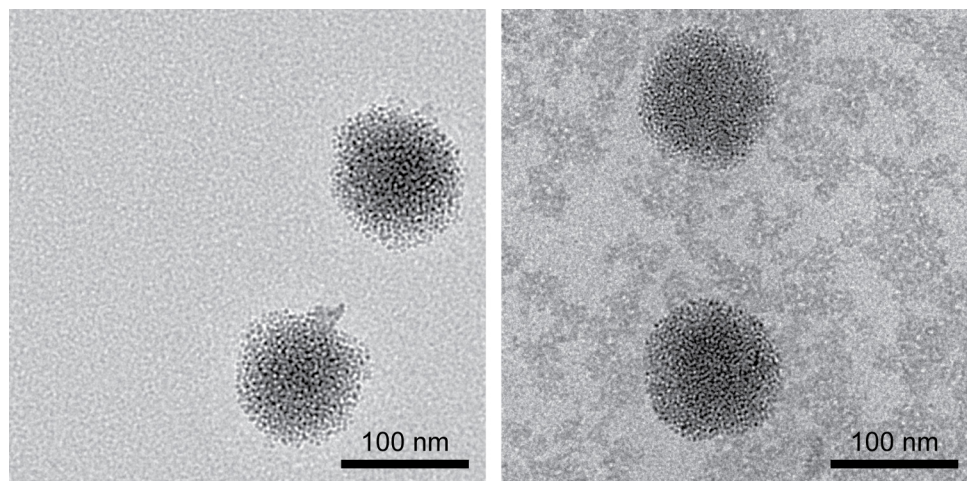

**Figure S4.** Transmission Electron Microscopy image of GPMs in PBS (left) and after a 24 hour incubation in serum at 37°C.

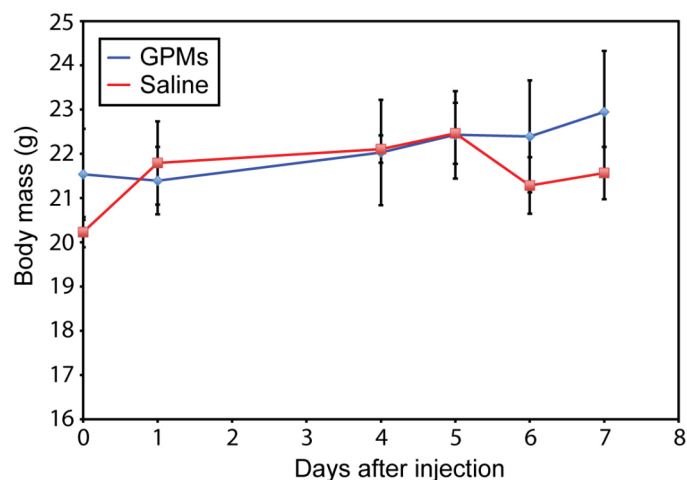

**Figure S5.** Whole animal weights of tumor-free mice treated with 650 mg Au/kg GPMs compared with mice sham injected with phosphate buffered saline. Data reflect average weights ( $n = 3$ ) for each group.

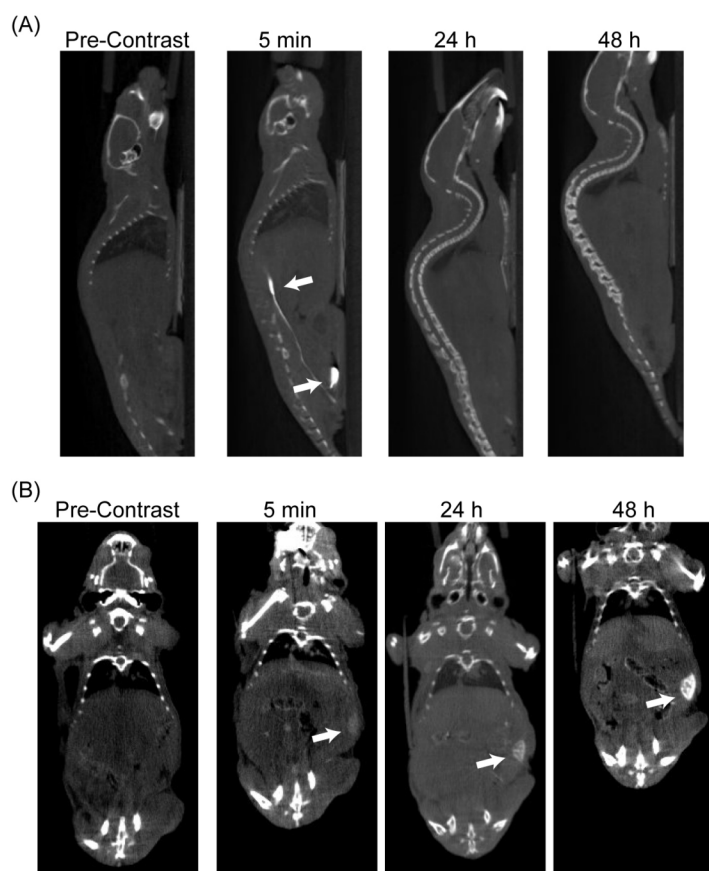

**Figure S6.** Computed tomography images of mice injected with AuroVist<sup>TM</sup> or GPMs. (A) The kidneys, ureter and bladder (arrows) are enhanced during early imaging time points following the injection of AuroVist<sup>TM</sup>, but no contrast is evident at 24 h or 48 h, consistent with renal clearance. (B) The spleen (arrows) is observed as early as 5 min post-injection of GPMs and contrast continues to increase over the next 48 h, indicative of RES uptake.

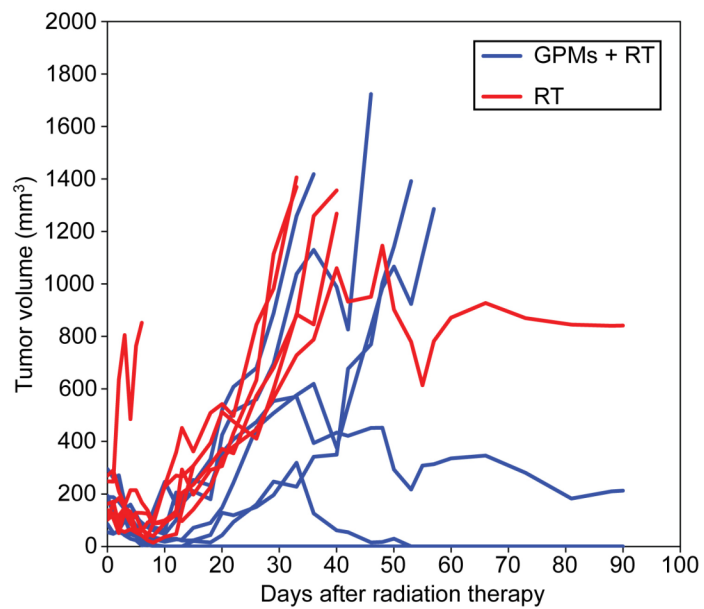

**Figure S7.** Tumor growth curves of mice receiving GPMs and radiation therapy (blue) or radiation therapy alone (red).
